# Supplementary material
Source: publisher figshare collection journal article supplement (https://sage.figshare.com/ndownloader/files/21961308)
Supplement: Supplementary file 1 [file 21961308]

| Sample ID | Sample type | Before charring: | After charring | After charring and sieving |
| --- | --- | --- | --- | --- |
| *Ledum palustre* | Shrub | 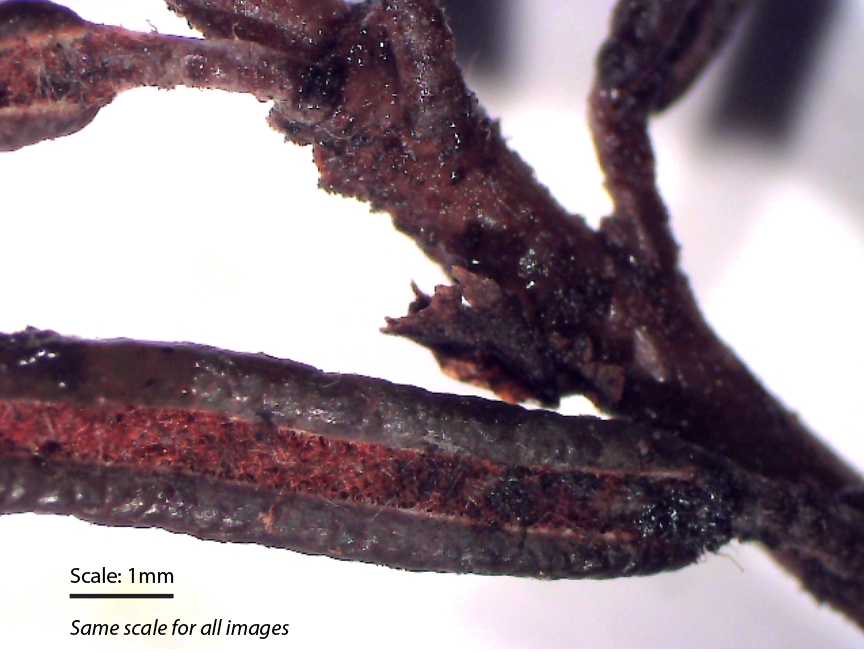 | 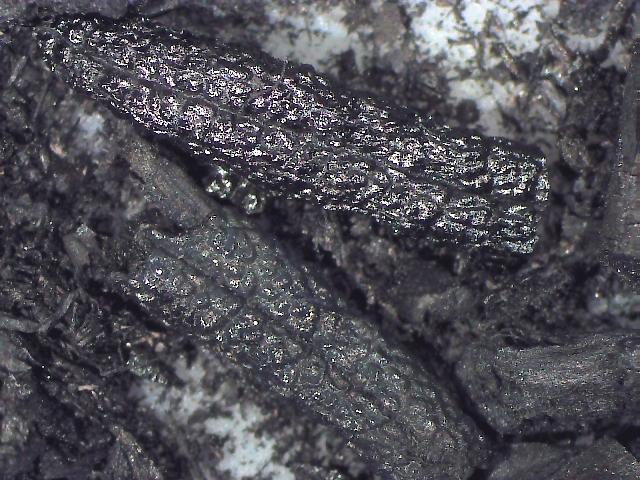 | 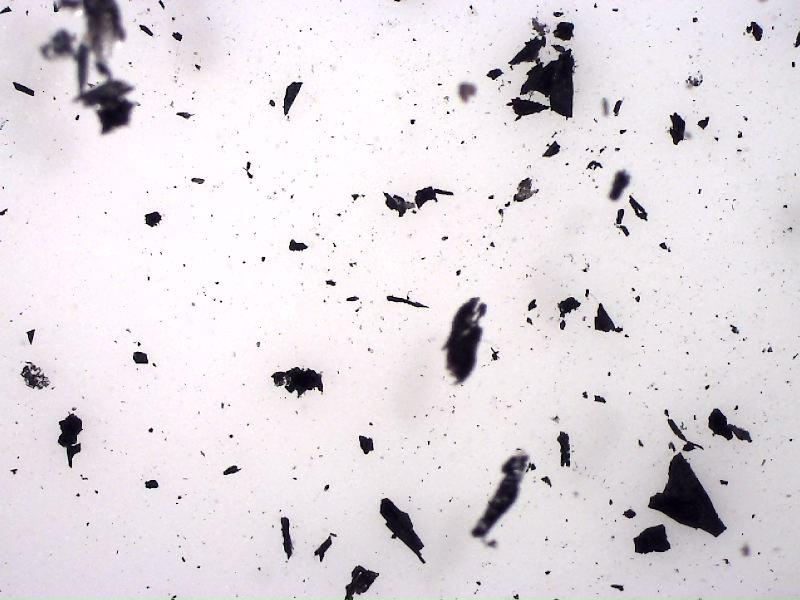 |
| *Salix pulchra* | Shrub | 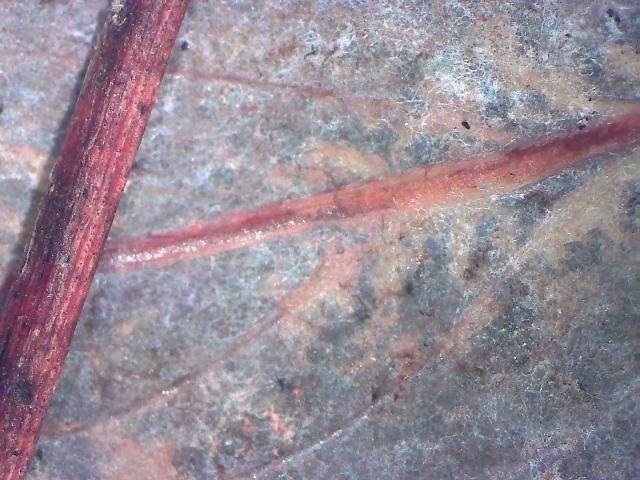 | 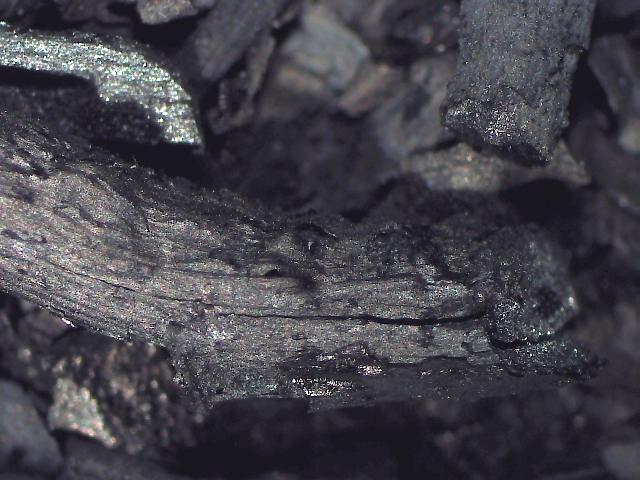 | 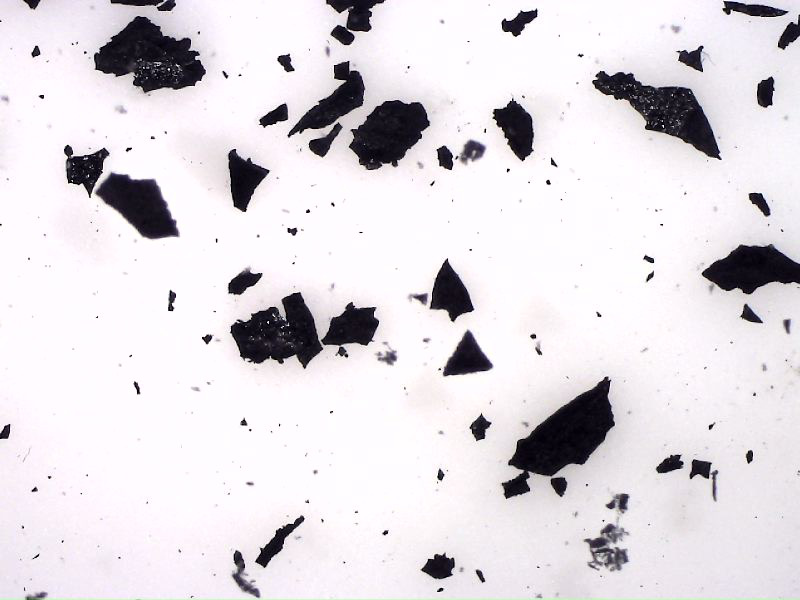 |
| *Betula nana* | Shrub | 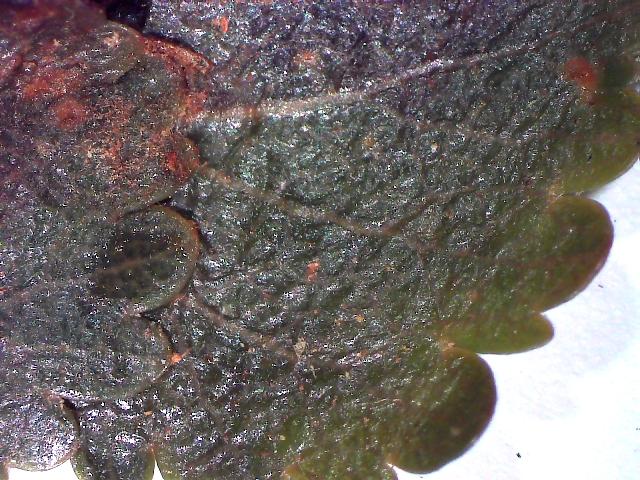 | 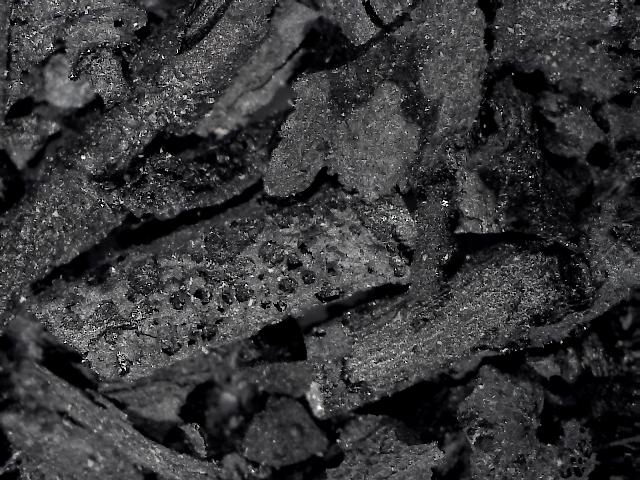 | 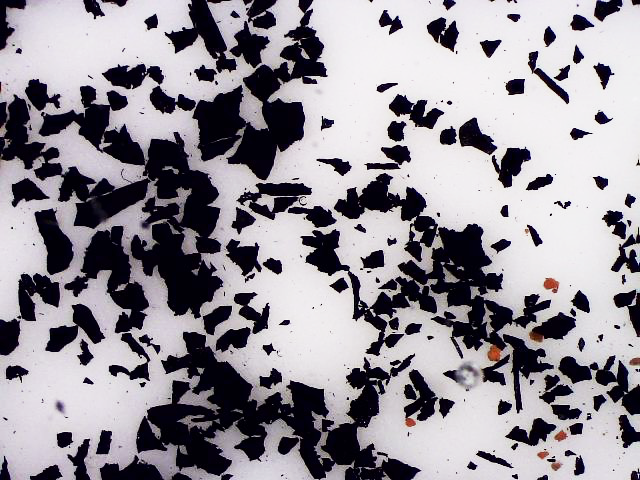 |
| *Vaccinium vitis-idaea* | Shrub | 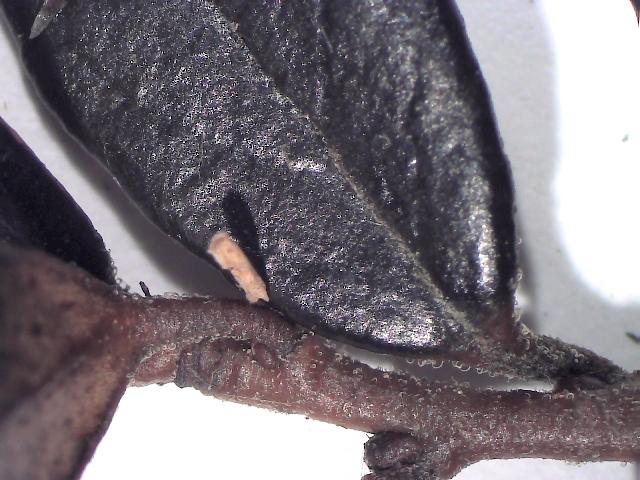 | 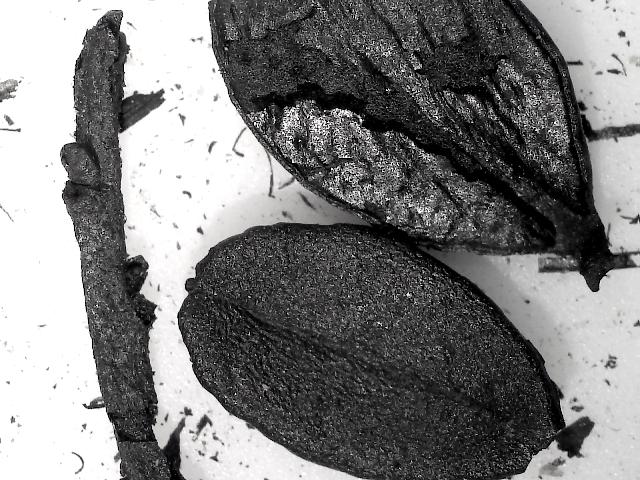 | 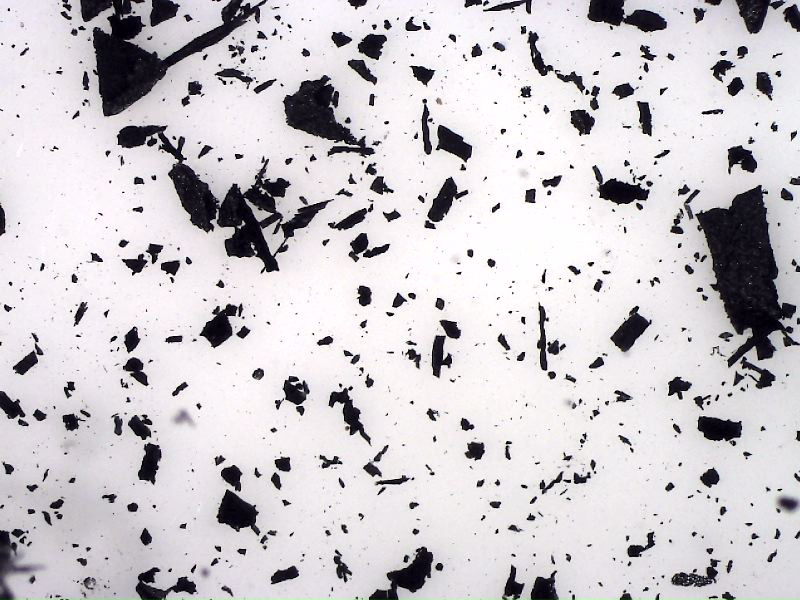 |
| *Rubus chamaemorus* | Shrub/Forb | 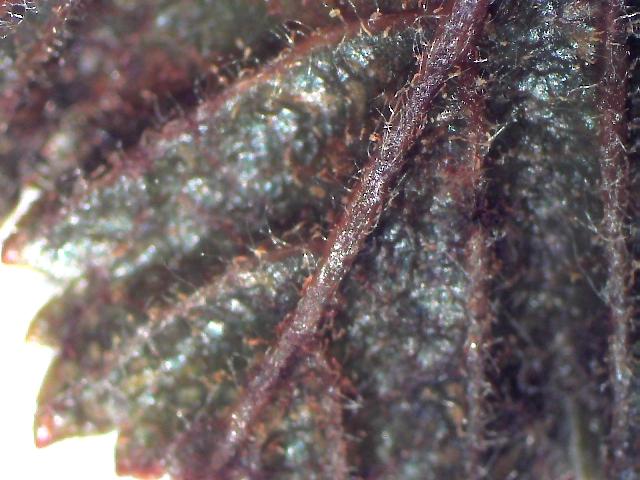 | 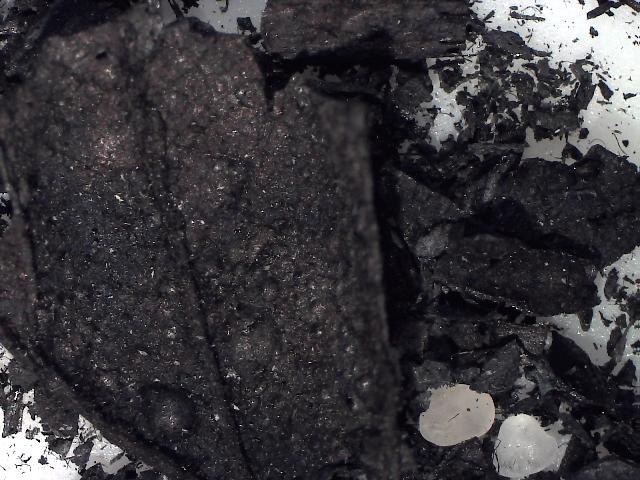 | 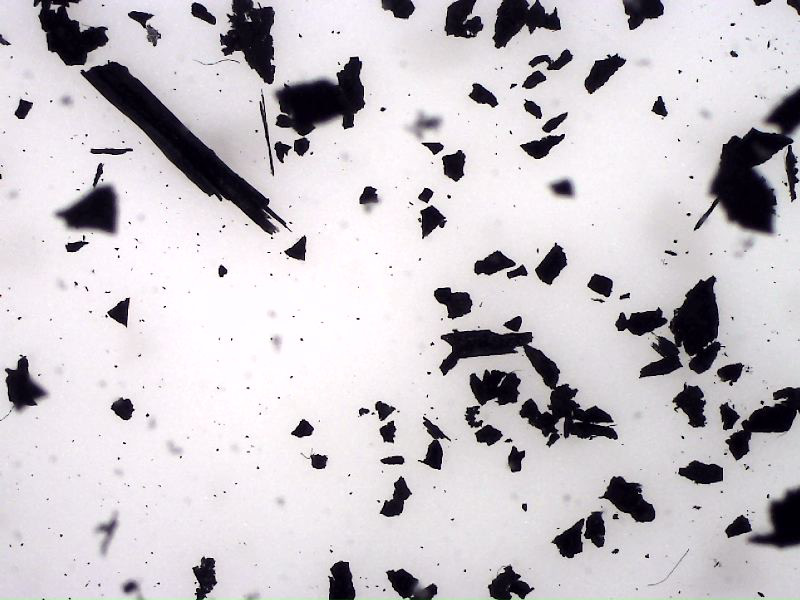 |
| *Eriophorum vaginatum* | Graminoid | 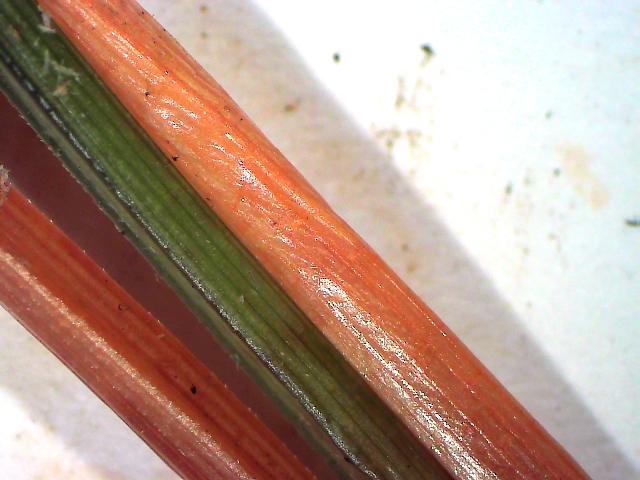 | 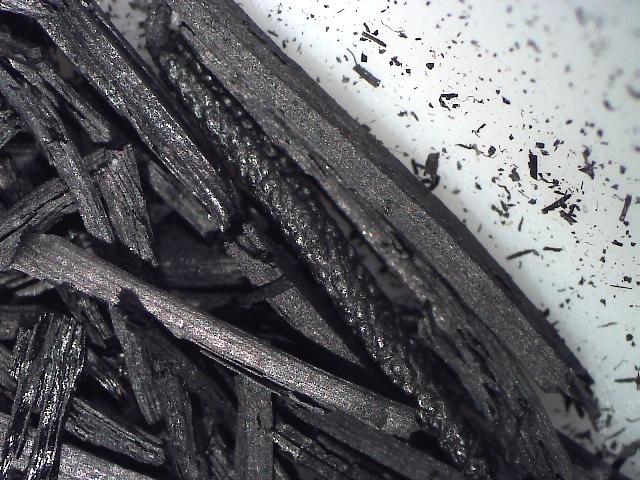 | 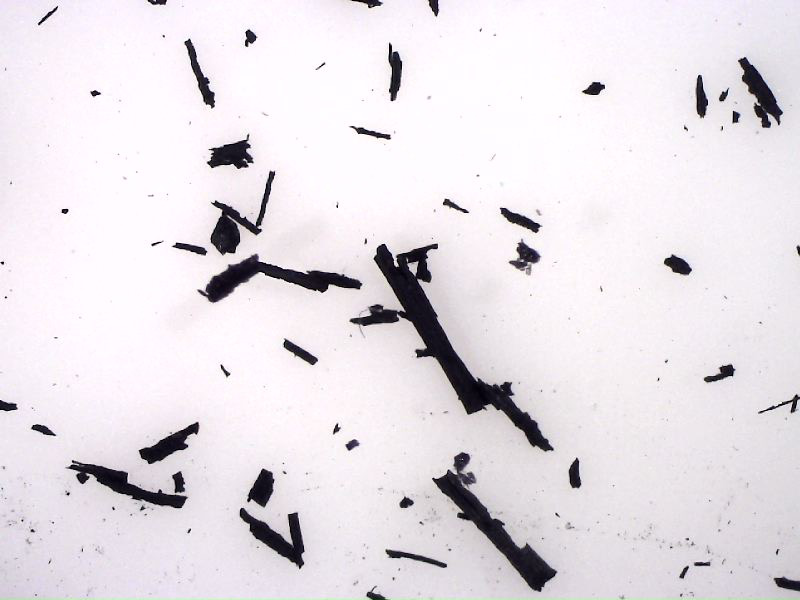 |
| *Carex bigelowii* | Graminoid | 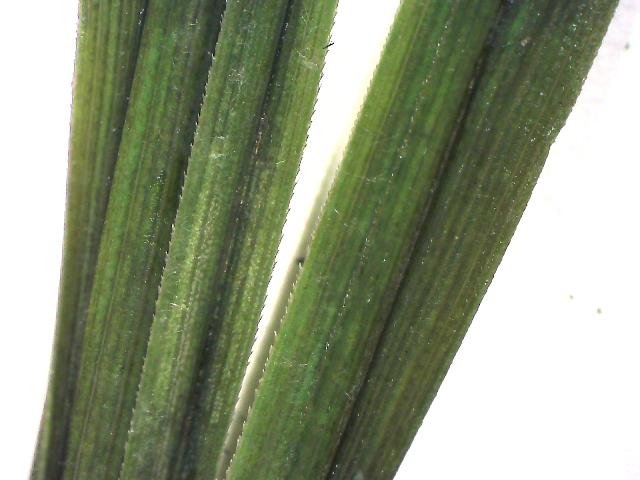 | 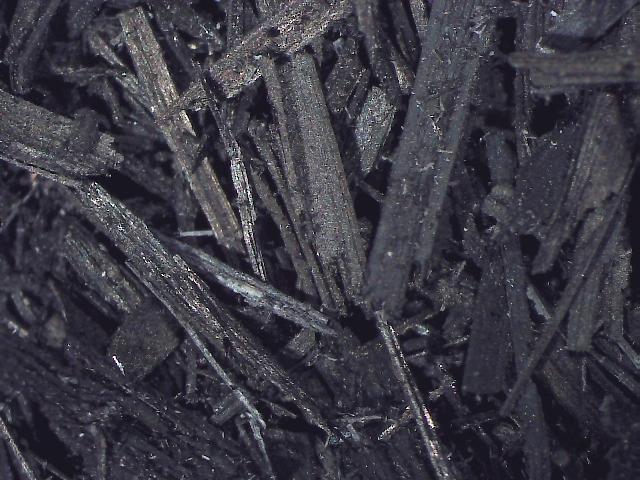 | 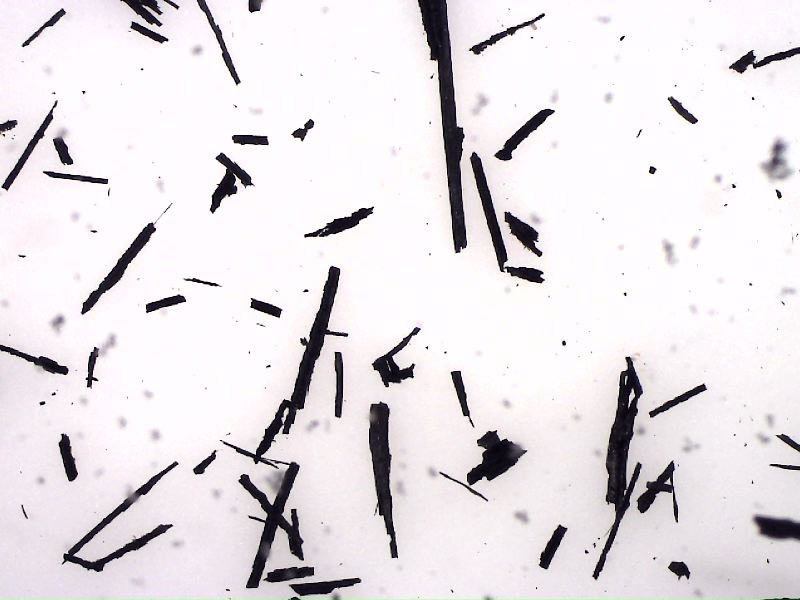 |
| Peat | Partially decomposed plant refuse (mixture) | 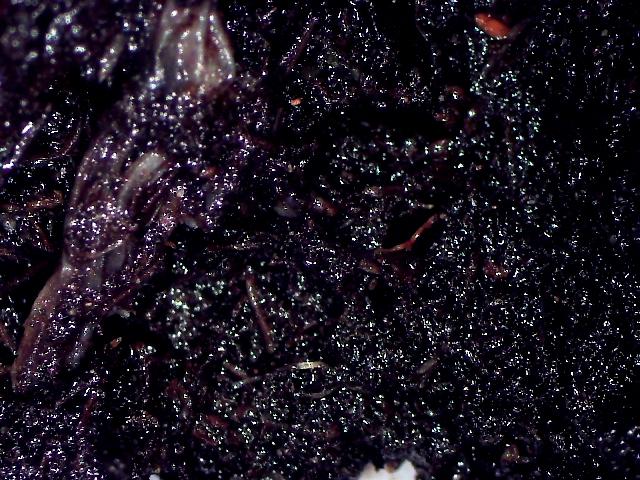 | 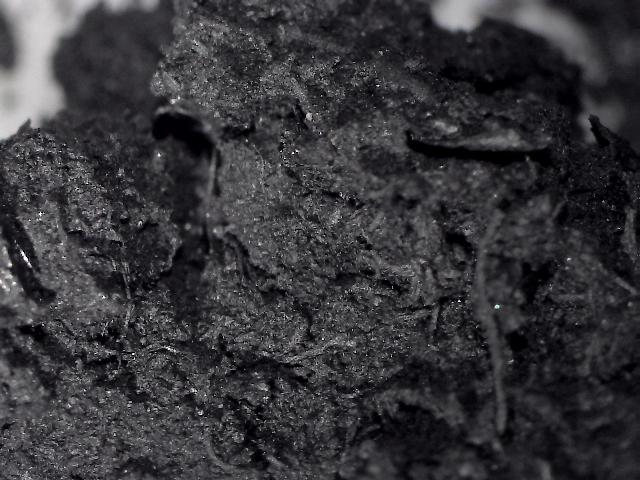 | 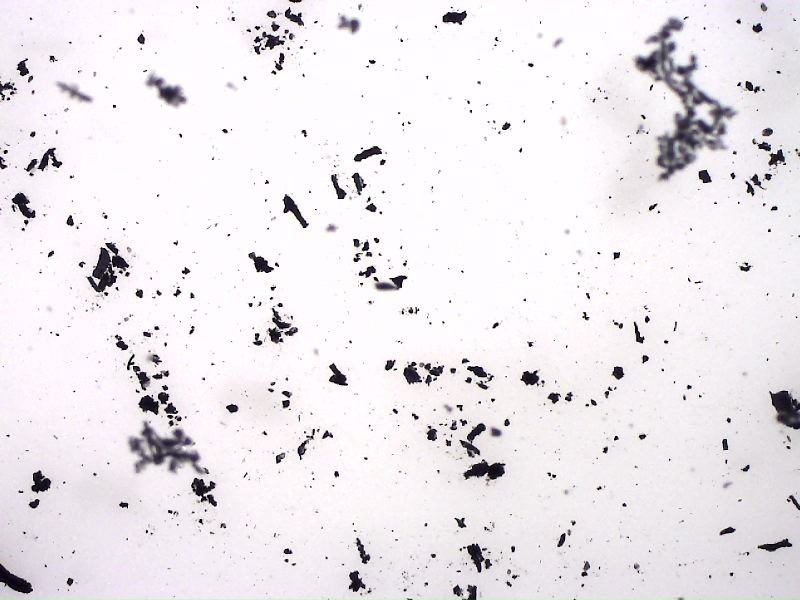 |
